# Supplementary material for: Coronavirus Disease 2019 Coexistence in the Daily Practice
Source: PubMed Central journal article supplement — Eur J Dent. 2020 Dec 15;14(Suppl 1):S171–6. doi: 10.1055/s-0040-1719217 (PMC7775240; doi:10.1055/s-0040-1719217), 2020-12-15
Supplement: 10-1055-s-0040-1719217_s8-0907.pdf [file 10-1055-s-0040-1719217_s8-0907.pdf]

Publisher: Thieme; Journal: EJD; Article Type: Review Article  
Journal ISSN: 1305-7456; Article ID Number: EJD-20-8-0907  
Volume Number: xx; Issue Number: xx

### **Supplementary Material**

Adjunctive website consulted during writing this narrative review:

<https://www.iss.it/coronavirus>

<https://www.who.int/emergencies/diseases/novel-coronavirus-2019>

<http://www.salute.gov.it/nuovocoronavirus>

<https://lab24.ilsole24ore.com/coronavirus/>

<https://www.andi.it>

<https://www.epicentro.iss.it/coronavirus/>

<https://www.fda.gov/medical-devices/personal-protective-equipment-infection-control/n95-respirators-and-surgical-masks-face-masks>

<https://www.nytimes.com/interactive/2020/03/15/business/economy/coronavirus-worker-risk.html>

<https://www.imperial.ac.uk/mrc-globalinfectious-disease-analysis/news—Wuhan-coronavirus>.
